# Supplementary material
Source: Research Square preprint supplement (doi:10.21203/rs.3.rs-9596581/v1)
Supplement: Supplementary file 1 [file 9831efc732d5f687f32f0959.xlsx]

## Sheet: Fig.1
Figure 1A. Cell viability
	Control						10 μM Shikonin						20 μM Shikonin						40 μM Shikonin
12h	105.03	103.47	102.87	97.81	97.21	95.65	91.44	89.98	89.42	84.68	84.12	82.66	79.4	78.34	77.94	74.52	74.12	73.06	64.81	63.59	63.13	59.19	58.73	57.51
24h	103.89	101.99	101.26	95.1	94.37	92.47	61.91	61.41	61.22	59.62	59.43	58.93	43.14	42.38	42.08	39.6	39.3	38.54	28.65	27.69	27.33	24.23	23.87	22.91
48h	104.87	103.25	102.63	97.37	96.75	95.13	9.51	8.99	8.79	7.09	6.89	6.37	10.73	9.89	9.58	6.88	6.57	5.73	8.92	7.84	7.43	3.93	3.52	2.44
	Figure 1C. Cell apoptosis						Figure 1C. Cell apoptosis
	Control	10 μM Shikonin	20 μM Shikonin	40 μM Shikonin			Control	10 μM Shikonin	20 μM Shikonin	40 μM Shikonin
	6.5	15.3	21.9	34.4			866.79	585.41	413.14	179.69
	7	16	22.5	33			942.67	638.67	451.67	199
	7.5	16.7	23.1	31.6			1018.55	691.93	490.2	218.31
Figure 1G. Cell cycle
	Control			10 μM Shikonin			20 μM Shikonin			40 μM Shikonin
G0/G1	68.1	69	69.9	58.3	59.5	60.7	50.6	52	53.4	42.4	43.5	44.6
S2	19.3	20	20.7	29.1	30	30.9	36.9	38	39.1	45.2	46.5	47.8
G2/M	6.6	7	7.4	7	7.8	9.3	7.9	8.5	9.1	8.7	10	8.3

## Sheet: Fig.2
Figure 2B. LC3 fluorescence intensity
Control	10 μM Shikonin	20 μM Shikonin	40 μM Shikonin
17.6	26.1	38.6	51.1
18.5	27.5	40.5	53.5
19.4	28.9	42.4	55.9
Figure 2C. P62
Control	SHK	GSK2656157	SHK+GSK2656157
1.05	0.82	1.15	0.92
0.95	0.78	1.22	0.98
1	0.85	1.18	0.95

## Sheet: Fig.3
Figure 3B. p-eIF2α/eIF2α
Control	SHK	GSK2656157	SHK+GSK2656157
0.783239	1.50693	0.453924	0.718619
0.807579	2.04082	0.263849	1.10728
1.05128	1.70288	0.45479	1.14219
Figure 3B. p-PERK/PERK
Control	SHK	GSK2656157	SHK+GSK2656157
0.349989	0.548612	0.083543	0.393402
0.138807	0.699688	0.067114	0.495511
0.32069	0.864075	0.0960083	0.308102
Figure 3B. Beclin1
Control	SHK	GSK2656157	SHK+GSK2656157
0.549907	1.0456	0.309549	0.549723
0.529663	1.7609	0.323406	0.981963
0.511984	1.33933	0.275511	0.707614
Figure 3B. CHOP
Control	SHK	GSK2656157	SHK+GSK2656157
1.21328	2.0344	0.609515	1.21156
1.3866	2.74328	0.596277	1.1734
0.93651	1.66302	0.475074	0.866674

## Sheet: Fig.4
Figure 4B. Tumor volume
	Control						10 mg/kg Shikonin						20 mg/kg Shikonin						40 mg/kg Shikonin
0d	47.05	48.97	51.52	57.9	60.45	62.37	44.57	46.2	48.38	53.81	55.98	57.61	48.44	49.48	50.87	54.34	55.72	56.76	46.9	48.72	51.15	57.22	59.64	61.46
3d	81.22	87.43	95.7	116.38	124.65	130.86	70.61	73.57	77.51	87.37	91.31	94.27	65.65	68.91	73.25	84.1	88.44	91.69	62.36	64.76	67.96	75.95	79.14	81.54
6d	123.09	132.04	143.98	173.81	185.74	194.69	100.95	105.72	112.08	127.98	134.34	139.11	87.13	92.48	99.62	117.45	124.58	129.93	77.51	81.5	86.82	100.11	105.42	109.41
9d	223.33	234.01	248.26	283.88	298.13	308.81	187.45	192.94	200.26	218.55	225.86	231.35	137.3	145.28	155.92	182.51	193.14	201.12	93.29	100.46	110.01	133.89	143.44	150.61
12d	337.91	356.92	382.26	445.62	470.96	489.97	249.23	255.63	264.17	285.51	294.05	300.45	189.62	199.88	213.57	247.78	261.46	271.72	119.57	131.59	147.62	187.69	203.71	215.73
15d	461.33	485.48	517.68	598.17	630.36	654.51	384.3	392.73	403.97	432.06	443.29	451.72	270.39	285.51	305.68	356.09	376.25	391.37	140.6	154.24	172.42	217.88	236.06	249.7
18d	647.12	676.58	715.86	814.06	853.34	882.8	517.27	526.62	539.09	570.26	582.72	592.07	359.63	383.13	414.47	492.81	524.15	547.65	179.88	200.55	228.11	297.01	324.57	345.24
21d	764.78	810.83	872.24	1025.75	1087.15	1133.2	618.81	630.1	645.16	682.8	697.86	709.15	440.99	468.08	504.2	594.49	630.6	657.69	219.79	245.49	279.76	365.43	399.69	425.39
Figure 4C. Tumor weight
Control	10 mg/kg Shikonin	20 mg/kg Shikonin	40 mg/kg Shikonin
0.534	0.474	0.338	0.222
0.597	0.502	0.394	0.271
0.639	0.521	0.431	0.304
0.681	0.539	0.469	0.336
0.723	0.558	0.506	0.369
0.786	0.586	0.562	0.418
Figure 4D. Mice weight
	Control						10 mg/kg Shikonin						20 mg/kg Shikonin						40 mg/kg Shikonin
0d	19.68	20.33	20.79	21.15	21.61	22.26	20.4	21.03	21.49	21.85	22.31	22.94	19.21	19.67	20	20.26	20.59	21.05	17.72	18.79	19.55	20.15	20.91	21.98
3d	20.6	21.04	21.35	21.59	21.9	22.34	20.74	21.13	21.41	21.63	21.91	22.3	20.09	20.44	20.7	20.9	21.16	21.51	18.48	19.46	20.15	20.71	21.4	22.38
6d	20.99	21.45	21.77	22.03	22.36	22.81	20.8	21.36	21.77	22.09	22.5	23.06	19.47	20	20.38	20.68	21.06	21.59	18.52	19.55	20.29	20.87	21.61	22.64
9d	21.62	21.92	22.13	22.31	22.52	22.82	21.78	22.36	22.77	23.09	23.5	24.08	19.02	19.75	20.27	20.69	21.21	21.94	18.46	19.54	20.31	20.93	21.7	22.78
12d	21	21.49	21.84	22.12	22.47	22.96	21.72	22.1	22.37	22.59	22.86	23.24	19.25	19.84	20.26	20.6	21.02	21.61	18.9	19.99	20.76	21.38	22.16	23.24
15d	21.4	21.71	21.93	22.11	22.33	22.64	21.68	21.98	22.19	22.35	22.56	22.86	20.08	20.36	20.57	20.73	20.94	21.22	19.15	20.27	21.08	21.72	22.53	23.65
18d	21.55	22.2	22.66	23.04	23.5	24.15	22.49	23.01	23.38	23.68	24.05	24.57	19.76	20.42	20.89	21.27	21.74	22.4	19.34	20.48	21.29	21.95	22.76	23.9
21d	21.82	22.61	23.17	23.63	24.19	24.98	22.05	23.03	23.74	24.3	25.01	25.99	22.95	21.4	21.72	21.98	22.3	22.75	19.74	21.05	21.99	22.75	23.69	25
