# Supplementary material
Source: Research Square preprint supplement (doi:10.21203/rs.3.rs-9596581/v1)
Supplement: Supplementary file 2 [file aefe5d563d8539105ea6e682.xlsx]

## Sheet: Sheet1
	Sample	Sample size	Statistic method	P value	F, DFn, Dfd
Figure 1A. Cell viability	12h		Two-way ANOVA with Dunnett's multiple comparisons test		F (6, 60) = 220.2, P < 0.0001 F (2, 60) time = 1712, P < 0.0001 F (3, 60) dose = 1825, P < 0.0001
	Control vs. 10 μM Shikonin	n = 6, 6		P < 0.0001
	Control vs. 20 μM Shikonin
	Control vs. 40 μM Shikonin
	24h
	Control vs. 10 μM Shikonin	n = 6, 6		P < 0.0001
	Control vs. 20 μM Shikonin
	Control vs. 40 μM Shikonin
	48h
	Control vs. 10 μM Shikonin	n = 6, 6		P < 0.0001
	Control vs. 20 μM Shikonin
	Control vs. 40 μM Shikonin
Figure 1C. Cell apoptosis	Control vs. 10 μM Shikonin	n = 3, 3	One-way ANOVA with Dunnett's multiple comparisons test	P < 0.0001	F (3, 8) = 470.2, P < 0.0001
	Control vs. 20 μM Shikonin
	Control vs. 40 μM Shikonin
Figure 1E. Cell migration	Control vs. 10 μM Shikonin	n = 3, 3	One-way ANOVA with Dunnett's multiple comparisons test	P = 0.0002	F (3, 8) = 112.8, P < 0.0001
	Control vs. 20 μM Shikonin			P < 0.0001
	Control vs. 40 μM Shikonin			P < 0.0001
Figure 1G. Cell cycle	G0/G1		Two-way ANOVA with Dunnett's multiple comparisons test		F (6, 24) = 360.0, P < 0.0001 F (2, 24) phase = 6719, P < 0.0001 F (3, 24) dose = 1.703, P = 0.1930
	Control vs. 10 μM Shikonin	n = 3, 3		P < 0.0001
	Control vs. 20 μM Shikonin
	Control vs. 40 μM Shikonin
	S2
	Control vs. 10 μM Shikonin	n = 3, 3		P < 0.0001
	Control vs. 20 μM Shikonin
	Control vs. 40 μM Shikonin
	G2/M
	Control vs. 10 μM Shikonin	n = 3, 3		P < 0.0001
	Control vs. 20 μM Shikonin
	Control vs. 40 μM Shikonin
Figure 2B. LC3 fluorescence intensity	Control vs. 10 μM Shikonin	n = 3, 3	One-way ANOVA with Dunnett's multiple comparisons test	P = 0.0006	F (3, 8) = 231.0, P < 0.0001
	Control vs. 20 μM Shikonin			P < 0.0001
	Control vs. 40 μM Shikonin			P < 0.0001
Figure 2C. P62	Control vs. SHK	n = 3, 3	One-way ANOVA with Tukey's multiple comparisons test	P = 0.0017	F (3, 8) = 47.11, P < 0.0001
	Control vs. CQ			P = 0.0017
	Control vs. CQ+SHK			P = 0.4304
	SHK vs. CQ			P < 0.0001
	SHK vs. CQ+SHK			#P = 0.0117
	CQ vs. CQ+SHK			P < 0.0001
Figure 3B. p-eIF2α/eIF2α	Control vs. SHK	n = 3, 3	One-way ANOVA with Tukey's multiple comparisons test	P = 0.0033	F (3, 8) = 23.37, P = 0.0003
	Control vs. GSK2656157			P = 0.0686
	Control vs. SHK+GSK2656157			P = 0.9089
	SHK vs. GSK2656157			P = 0.0005
	SHK vs. SHK+GSK2656157			#P = 0.0074
	GSK2656157 vs. SHK+GSK2656157			P = 0.0272
Figure 3B. p-PERK/PERK	Control vs. SHK	n = 3, 3	One-way ANOVA with Tukey's multiple comparisons test	P = 0.0052	F (3, 8) = 17.46, P = 0.0007
	Control vs. GSK2656157			P = 0.2257
	Control vs. SHK+GSK2656157			P = 0.5011
	SHK vs. GSK2656157			P = 0.0005
	SHK vs. SHK+GSK2656157			#P = 0.0355
	GSK2656157 vs. SHK+GSK2656157			P = 0.0295
Figure 3B. Beclin1	Control vs. SHK	n = 3, 3	One-way ANOVA with Tukey's multiple comparisons test	P = 0.0050	F (3, 8) = 14,54, P = 0.0013
	Control vs. GSK2656157			P = 0.5757
	Control vs. SHK+GSK2656157			P = 0.6138
	SHK vs. GSK2656157			P = 0.0011
	SHK vs. SHK+GSK2656157			#P = 0.0254
	GSK2656157 vs. SHK+GSK2656157			P = 0.1211
Figure 3B. CHOP	Control vs. SHK	n = 3, 3	One-way ANOVA with Tukey's multiple comparisons test	P = 0.0225	F (3, 8) = 13.33, P = 0.0018
	Control vs. GSK2656157			P = 0.1515
	Control vs. SHK+GSK2656157			P = 0.9814
	SHK vs. GSK2656157			P = 0.0012
	SHK vs. SHK+GSK2656157			#P = 0.0137
	GSK2656157 vs. SHK+GSK2656157			P = 0.2496
Figure 4B. Tumor volume	0d		RM two-way ANOVA with Dunnett's multiple comparisons test		F (21, 140) = 51.26, P < 0.0001 F (1.026, 20.52) time = 951.3, P < 0.0001 F (3, 20) dose = 36.67, P < 0.0001 F (20, 140) subject = 12.92, P < 0.0001
	Control vs. 10 mg/kg Shikonin	n = 6, 6		P = 0.6040
	Control vs. 20 mg/kg Shikonin			P = 0.8201
	Control vs. 40 mg/kg Shikonin			P > 0.9976
	3d
	Control vs. 10 mg/kg Shikonin	n = 6, 6		P = 0.0915
	Control vs. 20 mg/kg Shikonin			P = 0.0534
	Control vs. 40 mg/kg Shikonin			P = 0.0199
	6d
	Control vs. 10 mg/kg Shikonin	n = 6, 6		P = 0.0573
	Control vs. 20 mg/kg Shikonin			P = 0.0183
	Control vs. 40 mg/kg Shikonin			P = 0.0046
	9d
	Control vs. 10 mg/kg Shikonin	n = 6, 6		P = 0.0234
	Control vs. 20 mg/kg Shikonin			P = 0.0011
	Control vs. 40 mg/kg Shikonin			P < 0.0001
	12d
	Control vs. 10 mg/kg Shikonin	n = 6, 6		P = 0.0052
	Control vs. 20 mg/kg Shikonin			P = 0.0008
	Control vs. 40 mg/kg Shikonin			P < 0.0001
	15d
	Control vs. 10 mg/kg Shikonin	n = 6, 6		P = 0.0159
	Control vs. 20 mg/kg Shikonin			P = 0.0008
	Control vs. 40 mg/kg Shikonin			P < 0.0001
	18d
	Control vs. 10 mg/kg Shikonin	n = 6, 6		P = 0.0061
	Control vs. 20 mg/kg Shikonin			P = 0.0004
	Control vs. 40 mg/kg Shikonin			P < 0.0001
	21d
	Control vs. 10 mg/kg Shikonin	n = 6, 6		P = 0.0128
	Control vs. 20 mg/kg Shikonin			P = 0.0014
	Control vs. 40 mg/kg Shikonin			P < 0.0001
Figure 4C. Tumor weight	Control vs. 10 mg/kg Shikonin	n = 6, 6	One-way ANOVA with Dunnett's multiple comparisons test	P = 0.0150	F (3, 20) = 23.20, P < 0.0001
	Control vs. 20 mg/kg Shikonin			P = 0.0002
	Control vs. 40 mg/kg Shikonin			P < 0.0001
Figure 4D. Mice weight	0d		RM two-way ANOVA with Dunnett's multiple comparisons test		F (21, 140) = 6.611, P < 0.0001 F (1.026, 20.52) time = 161.5, P < 0.0001 F (3, 20) dose = 4.319, P = 0.0168 F (20, 140) subject = 101.8, P < 0.0001
	Control vs. 10 mg/kg Shikonin	n = 6, 6		P = 0.4407
	Control vs. 20 mg/kg Shikonin			P = 0.2273
	Control vs. 40 mg/kg Shikonin			P = 0.3396
	3d
	Control vs. 10 mg/kg Shikonin	n = 6, 6		P = 0.9976
	Control vs. 20 mg/kg Shikonin			P = 0.1589
	Control vs. 40 mg/kg Shikonin			P = 0.2967
	6d
	Control vs. 10 mg/kg Shikonin	n = 6, 6		P = 0.9999
	Control vs. 20 mg/kg Shikonin			P = 0.0187
	Control vs. 40 mg/kg Shikonin			P = 0.1887
	9d
	Control vs. 10 mg/kg Shikonin	n = 6, 6		P = 0.2195
	Control vs. 20 mg/kg Shikonin			P = 0.0185
	Control vs. 40 mg/kg Shikonin			P = 0.1166
	12d
	Control vs. 10 mg/kg Shikonin	n = 6, 6		P = 0.4125
	Control vs. 20 mg/kg Shikonin			P = 0.0161
	Control vs. 40 mg/kg Shikonin			P = 0.4645
	15d
	Control vs. 10 mg/kg Shikonin	n = 6, 6		P = 0.6367
	Control vs. 20 mg/kg Shikonin			P = 0.0006
	Control vs. 40 mg/kg Shikonin			P = 0.7035
	18d
	Control vs. 10 mg/kg Shikonin	n = 6, 6		P = 0.4026
	Control vs. 20 mg/kg Shikonin			P = 0.0211
	Control vs. 40 mg/kg Shikonin			P = 0.3146
	21d
	Control vs. 10 mg/kg Shikonin	n = 6, 6		P = 0.7406
	Control vs. 20 mg/kg Shikonin			P = 0.1151
	Control vs. 40 mg/kg Shikonin			P = 0.5491
